# Supplementary material for: Fine-tuning ultramicroporosity in PIM-1 membranes by aldehyde functionalization for efficient hydrogen separation
Source: Royal Society of Chemistry journal article supplement (doi:10.1039/d4ta04082a), 2024-01-01
Supplement: d4ta04082a1.pdf [file d4ta04082a1.pdf]

## Supplementary Information

### **Fine-tuning ultramicroporosity in PIM-1 membranes by aldehyde functionalization for efficient hydrogen separation**

Tae Hoon Lee, Taigyu Joo, Philippe Jean-Baptiste, Pablo A. Dean, Jing Ying Yeo, and Zachary P. Smith\*

Department of Chemical Engineering, Massachusetts Institute of Technology, Cambridge, Massachusetts 02139, United States

Corresponding author: [zpsmith@mit.edu](mailto:zpsmith@mit.edu) (Z. P. Smith)

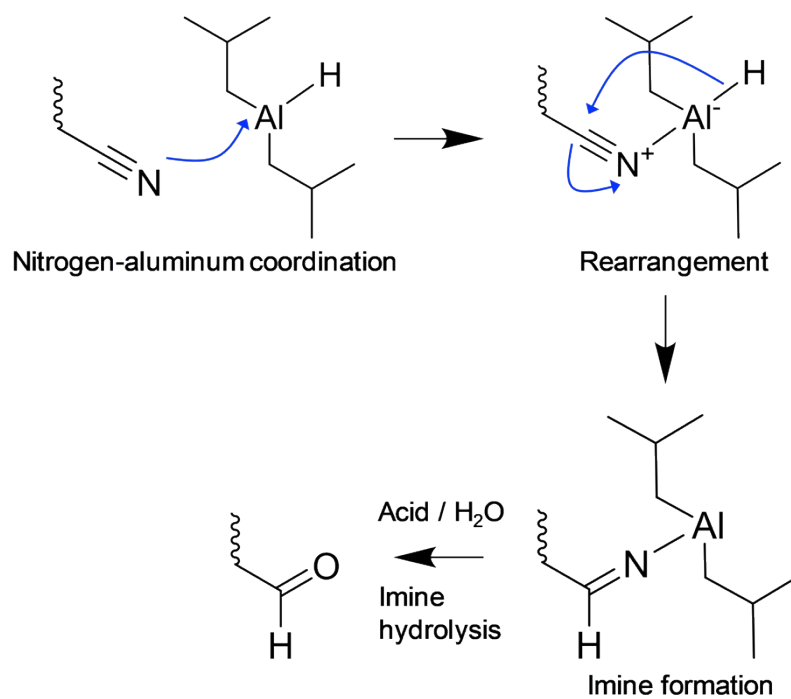

**Fig. S1.** Schematic illustration of reduction of nitrile with DIBAL and subsequent imine hydrolysis with acid.<sup>1</sup>

**Table S1.** Predicted and XPS-based elemental concentrations of PIM-1 and PIM-CHO.

| Sample           | Atomic ratio (at.%) |     |      |
|------------------|---------------------|-----|------|
|                  | C                   | N   | O    |
| PIM-1 (Theory)   | 82.9                | 5.7 | 11.4 |
| PIM-1 (XPS)      | 81.0                | 5.1 | 13.9 |
| PIM-CHO (Theory) | 82.9                | -   | 17.1 |
| PIM-CHO (XPS)    | 79.6                | 0.3 | 20.1 |

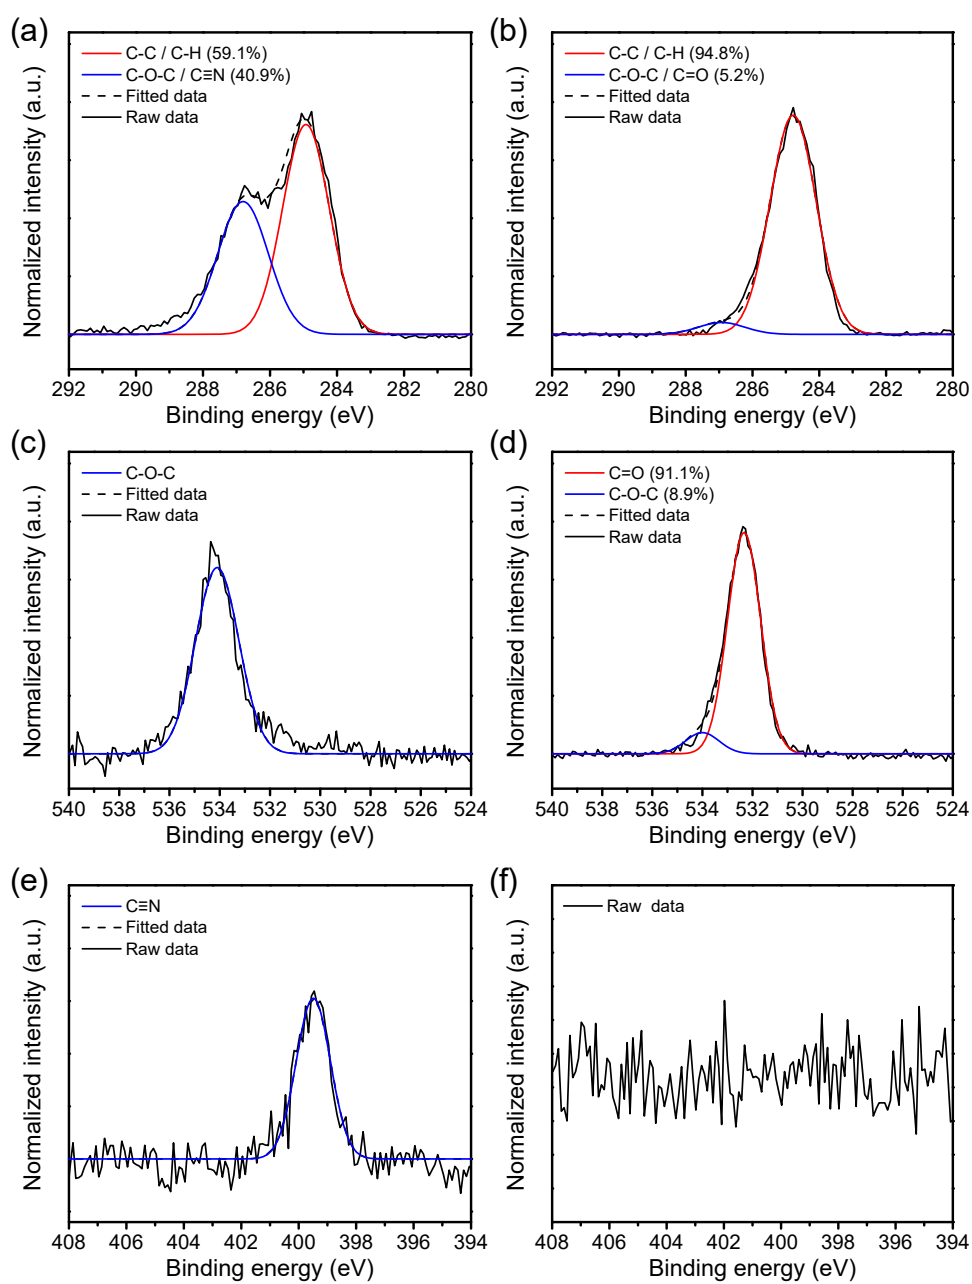

**Fig. S2.** High-resolution (a–b) C 1s, (c–d) O 1s, and (e–f) N 1s XPS spectra of (a,c,e) PIM-1 and (b,d,f) PIM-CHO.<sup>2</sup> Peak fitting for N 1s XPS spectrum of PIM-CHO was not performed due to the negligible presence of nitrogen.

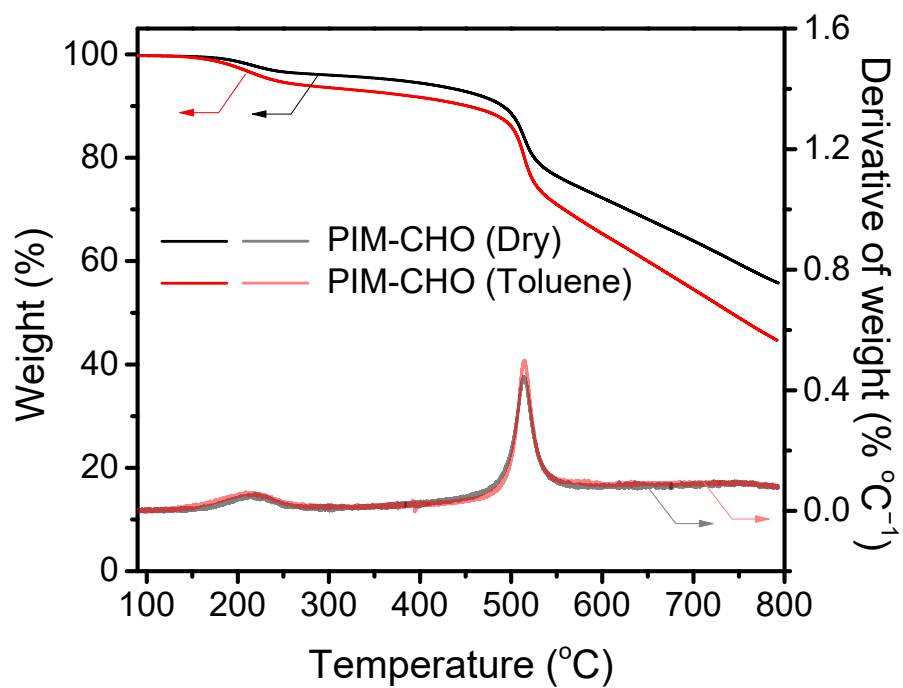

**Fig. S3.** TGA curves of PIM-CHO films prepared with (Dry) or without toluene pretreatment (Toluene).

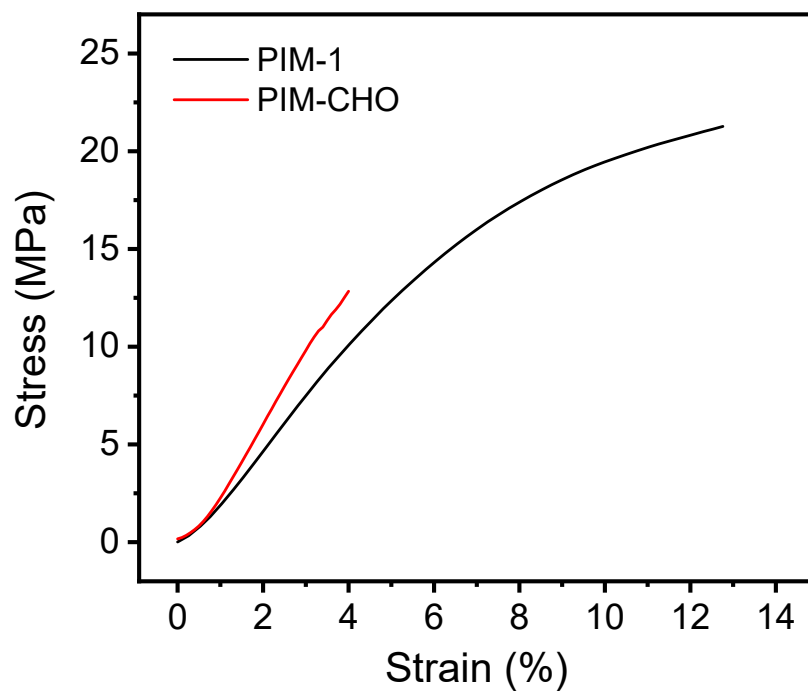

**Fig. S4.** Stress-strain curves of PIM-1 and PIM-CHO films.

**Table S2.** Mechanical properties of PIM-1 and PIM-CHO films calculated from the stress-strain curves in Fig. S4.

| Sample  | Young's modulus (MPa) | Tensile strength (MPa) | Elongation at break (%) |
|---------|-----------------------|------------------------|-------------------------|
| PIM-1   | 246                   | 21.2                   | 12.8                    |
| PIM-CHO | 317                   | 12.9                   | 3.0                     |

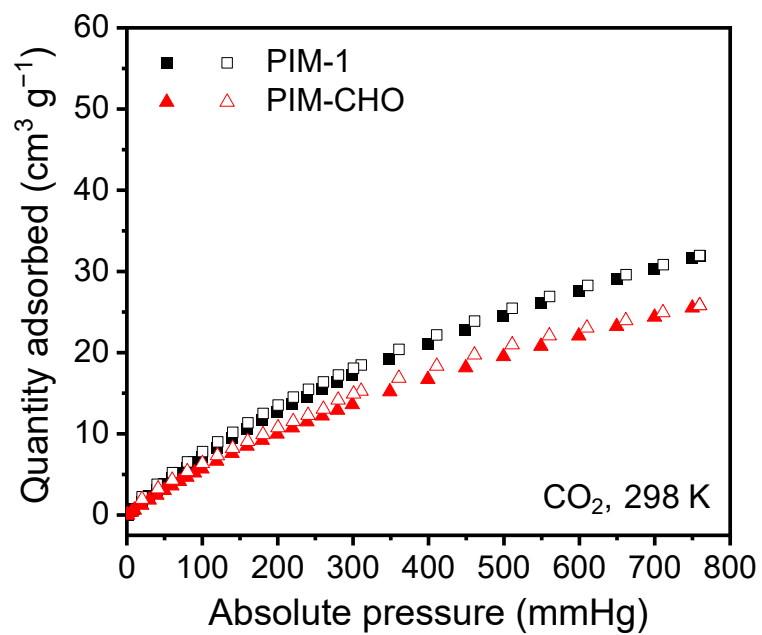

**Fig. S5.** CO<sub>2</sub> adsorption–desorption isotherms of PIM-1 and PIM-CHO up to 1 bar at 298 K.



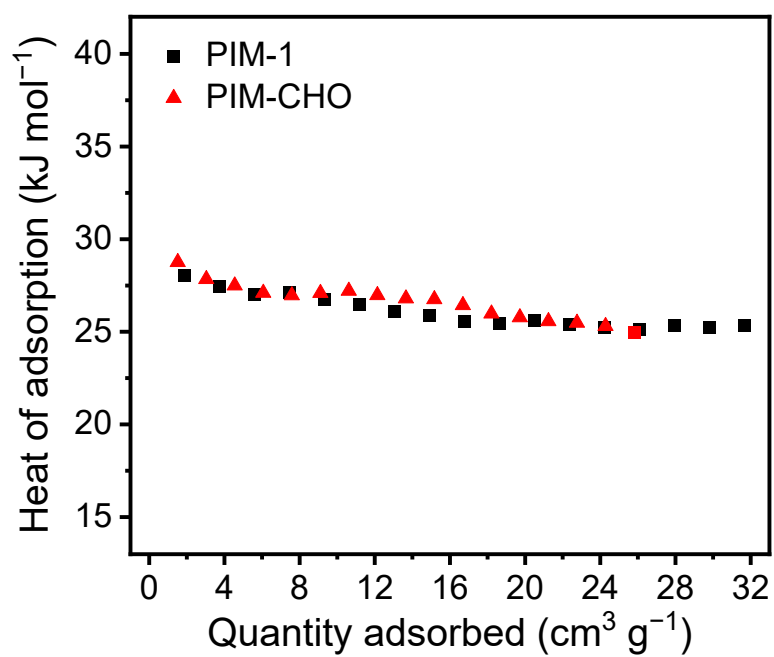

**Fig. S6.** Isostatic heat of adsorption for PIM-1 and PIM-CHO obtained from CO<sub>2</sub> sorption isotherms at 273 and 298 K (Fig. 2b and Fig. S5, respectively).

**Table S3.** Gas separation performance of functionalized PIM-1 membrane films reported in the literature and reported in this study. The corresponding chemical structures of membranes

| Polymer film                     | PIM-1 <sup>a</sup>        | PIM-Tol-HCl <sup>a</sup> | PIM-CHO <sup>a</sup> | PIM-COOH <sup>3</sup> | PIM-AO <sup>5</sup> | PIM-TZ <sup>4</sup> | PIM-NH <sub>2</sub> <sup>7</sup> | PIM-deBOC (thermal) <sup>6</sup> | PIM-Thio <sup>8</sup> |
|----------------------------------|---------------------------|--------------------------|----------------------|-----------------------|---------------------|---------------------|----------------------------------|----------------------------------|-----------------------|
| Gas                              | Gas permeability (barrer) |                          |                      |                       |                     |                     |                                  |                                  |                       |
| H <sub>2</sub>                   | 4190                      | 4060                     | 2550                 | 270                   | 910                 | -                   | 1450                             | 2000                             | 610                   |
| O <sub>2</sub>                   | 1710                      | 1680                     | 300                  | 44                    | 150                 | -                   | 430                              | 500                              | 140                   |
| CO <sub>2</sub>                  | 10300                     | 10900                    | 1510                 | 290                   | 1150                | 3000                | -                                | 2300                             | 1120                  |
| N <sub>2</sub>                   | 590                       | 560                      | 55                   | 9.0                   | 33                  | 100                 | 134                              | 120                              | 37                    |
| CH <sub>4</sub>                  | 1020                      | 960                      | 49                   | 9.0                   | 34                  | 136                 | 210                              | 170                              | 56                    |
| Gas pair                         | Ideal selectivity (-)     |                          |                      |                       |                     |                     |                                  |                                  |                       |
| H <sub>2</sub> /N <sub>2</sub>   | 7.1                       | 7.3                      | 42.8                 | 30.0                  | 27.6                | -                   | 10.8                             | 16.7                             | 16.5                  |
| H <sub>2</sub> /CH <sub>4</sub>  | 4.1                       | 4.2                      | 52.4                 | 30.0                  | 26.8                | -                   | 6.9                              | 11.8                             | 10.9                  |
| O <sub>2</sub> /N <sub>2</sub>   | 2.9                       | 3.0                      | 5.5                  | 4.9                   | 4.5                 | -                   | 3.2                              | 4.2                              | 3.8                   |
| CO <sub>2</sub> /CH <sub>4</sub> | 10.1                      | 11.4                     | 31.0                 | 32.2                  | 33.9                | 22.1                | -                                | 13.5                             | 20.0                  |

are shown in Fig. S5.

<sup>a</sup> This study.

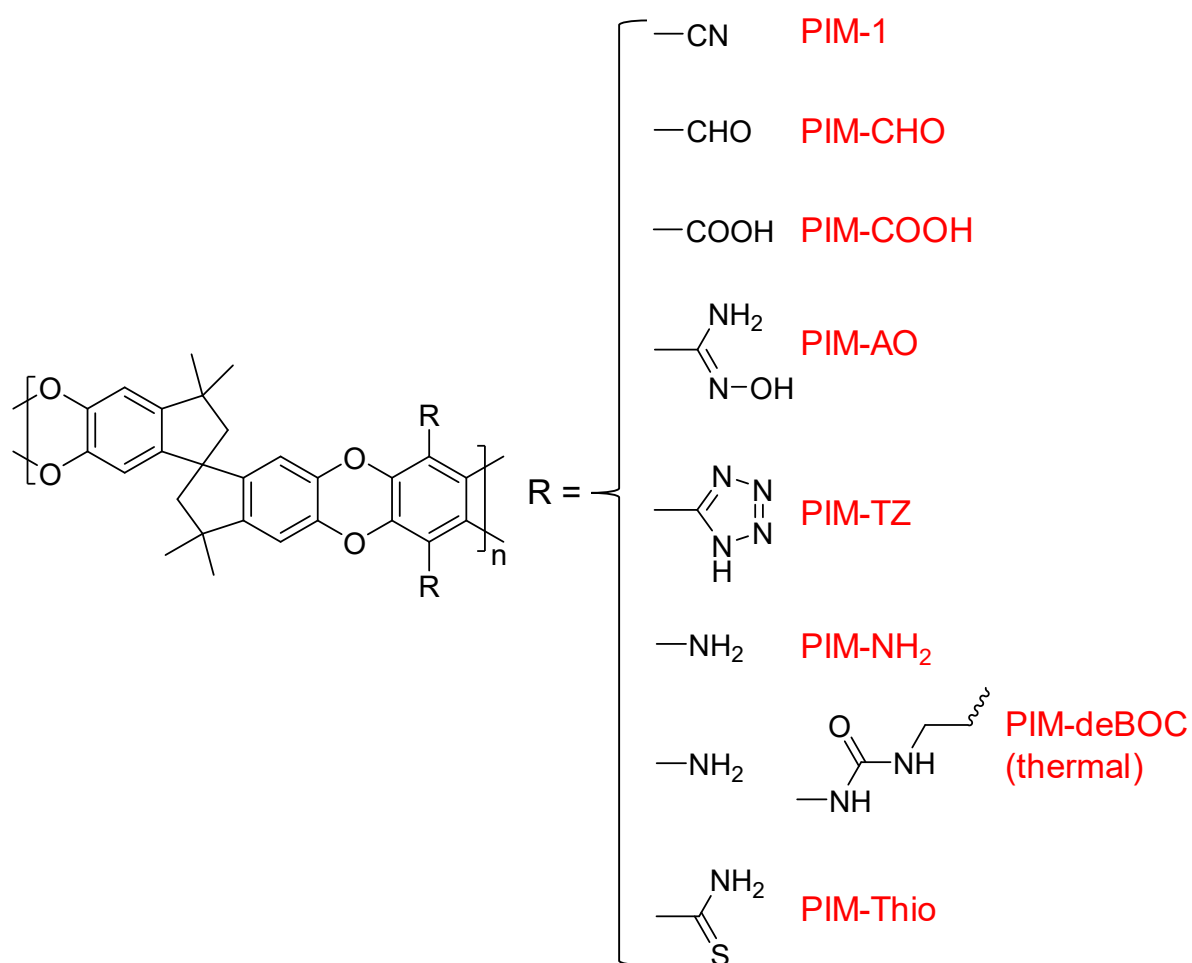

**Fig. S7.** Chemical structures of functionalized PIM-1 membranes reported in literature and reported in this study.<sup>3-8</sup>

**Table S4.** Dual-mode sorption model parameters calculated from CH<sub>4</sub> and CO<sub>2</sub> sorption isotherms at 35 °C (Fig. 4a).

| Sample  | Gas             | $k_D$<br>(cm <sup>3</sup> <sub>STP</sub> cm <sup>-3</sup> <sub>pol</sub> atm <sup>-1</sup> ) | $C'_H$<br>(cm <sup>3</sup> <sub>STP</sub> cm <sup>-3</sup> <sub>pol</sub> ) | $b$ (atm <sup>-1</sup> ) | $S_{Iatm}$<br>(cm <sup>3</sup> <sub>STP</sub> cm <sup>-3</sup> <sub>pol</sub> atm <sup>-1</sup> ) |
|---------|-----------------|----------------------------------------------------------------------------------------------|-----------------------------------------------------------------------------|--------------------------|---------------------------------------------------------------------------------------------------|
| PIM-1   | CH <sub>4</sub> | 1.43                                                                                         | 42.5                                                                        | 0.16                     | 7.3                                                                                               |
|         | CO <sub>2</sub> | 4.05                                                                                         | 65.8                                                                        | 0.59                     | 28.5                                                                                              |
| PIM-CHO | CH <sub>4</sub> | 1.17                                                                                         | 28.9                                                                        | 0.14                     | 4.7                                                                                               |
|         | CO <sub>2</sub> | 3.72                                                                                         | 40.1                                                                        | 0.67                     | 19.8                                                                                              |

**Table S5.** Diffusion, sorption, and permeability coefficients and the corresponding selectivities of PIM-1 and PIM-CHO membrane films measured at 35 °C and 1 bar.

| Sample  | Gas             | D<br>( $10^{-7} \times \text{cm}^2 \text{s}^{-1}$ ) | $S_{1\text{atm}}$<br>( $\text{cm}^3_{\text{STP}} \text{cm}^{-3}_{\text{pol}} \text{atm}^{-1}$ ) | P (barrer) | $D_{\text{CO}_2}$<br>/ $D_{\text{CH}_4}$ | $S_{\text{CO}_2}$<br>/ $S_{\text{CH}_4}$ | $P_{\text{CO}_2}$<br>/ $P_{\text{CH}_4}$ |
|---------|-----------------|-----------------------------------------------------|-------------------------------------------------------------------------------------------------|------------|------------------------------------------|------------------------------------------|------------------------------------------|
| PIM-1   | CH <sub>4</sub> | 10.6                                                | 7.3                                                                                             | 1020       | 2.6                                      | 3.9                                      | 10.1                                     |
|         | CO <sub>2</sub> | 27.4                                                | 28.5                                                                                            | 10300      |                                          |                                          |                                          |
| PIM-CHO | CH <sub>4</sub> | 0.8                                                 | 4.7                                                                                             | 49         | 7.3                                      | 4.2                                      | 31.0                                     |
|         | CO <sub>2</sub> | 5.8                                                 | 19.8                                                                                            | 1510       |                                          |                                          |                                          |

**Table S6.** Gas separation performance of PIM-1 and PIM-CHO membrane films before and after aging.

| Polymer film                     | PIM-1 (0 day)             | PIM-1 (53 days) | PIM-CHO (0 day) | PIM-CHO (56 days) |
|----------------------------------|---------------------------|-----------------|-----------------|-------------------|
| Gas                              | Gas permeability (barrer) |                 |                 |                   |
| H <sub>2</sub>                   | 4190                      | 3860            | 2550            | 1980              |
| CO <sub>2</sub>                  | 10300                     | 7680            | 1510            | 960               |
| O <sub>2</sub>                   | 1710                      | 1390            | 300             | 210               |
| N <sub>2</sub>                   | 590                       | 400             | 55              | 39                |
| CH <sub>4</sub>                  | 1020                      | 580             | 49              | 34                |
| Gas pair                         | Ideal selectivity (-)     |                 |                 |                   |
| H <sub>2</sub> /N <sub>2</sub>   | 7.1                       | 9.6             | 42.8            | 50.9              |
| H <sub>2</sub> /CH <sub>4</sub>  | 4.1                       | 6.7             | 52.4            | 58.2              |
| O <sub>2</sub> /N <sub>2</sub>   | 2.9                       | 3.5             | 5.5             | 5.5               |
| CO <sub>2</sub> /CH <sub>4</sub> | 10.1                      | 13.3            | 31.0            | 28.1              |

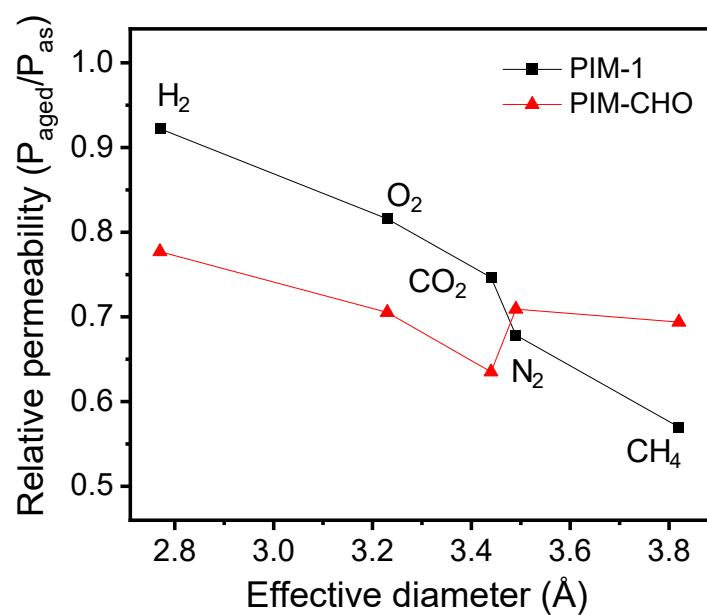

**Fig. S8.** Relative permeability ( $P_{aged}/P_{as}$ ) as the ratio of the gas permeabilities of aged membrane films to those of as-prepared ones depending on effective gas diameters. PIM-1 and PIM-CHO membrane films were aged for 53 and 56 days, respectively. Effective diameters were used as reported by Robeson *et al.*<sup>9</sup>

## References

- 1 A. E. G. Miller, J. W. Biss, and L. H. Schwartzman, *J. Org. Chem.*, 1959, **24**, 627–630.
- 2 Y. Liu, E. K. McGuinness, B. C. Jean, Y. Li, Y. Ren, B. G. D. Rio, R. P. Lively, M. D. Losego and R. Ramprasad, *J. Phys. Chem. B*, 2022, **126**, 5920–5930.
- 3 K. Mizrahi Rodriguez, A. X. Wu, Q. Qian, G. Han, S. Lin, F. M. Benedetti, H. Lee, W. S. Chi, C. M. Doherty and Z. P. Smith, *Macromolecules*, 2020, **53**, 6220–6234.
- 4 N. Du, H. B. Park, G. P. Robertson, M. M. Dal-Cin, T. Visser, L. Scoles and M. D. Guiver, *Nat. Mater.*, 2011, **10**, 372–375.
- 5 S. Yi, B. Ghanem, Y. Liu, I. Pinnau and W. J. Koros, *Sci. Adv.*, 2019, **5**, aaw5459.
- 6 K. Mizrahi Rodriguez, S. Lin, A. X. Wu, G. Han, J. J. Teesdale, C. M. Doherty and Z. P. Smith, *Angew. Chem. Int. Ed.*, 2021, **60**, 6593–6599.
- 7 T. Joo, K. Mizrahi Rodriguez, H. Lee, D. Acharya, C. M. Doherty and Z. P. Smith, *J. Mater. Chem. A*, 2023, **11**, 15943–15957.
- 8 C. R. Mason, L. Maynard-Atem, N. M. Al-Harbi, P. M. Budd, P. Bernardo, F. Bazzarelli, G. Clarizia and J. C. Jansen, *Macromolecules*, 2011, **44**, 6471–6479.
- 9 L. M. Robeson, Z. P. Smith, B. D. Freeman and D. R. Paul, *J. Membr. Sci.*, 2014, **453**, 71–83.
